# Supplementary material for: Climate-related urban migration: scope and gaps in the academic literature
Source: Research Square preprint supplement (doi:10.21203/rs.3.rs-7982606/v1), 2026-01-23
Supplement: Supplementary file 1 [file 60b61fd96e7fa5ca1954a516.docx]

**Supplementary Information for ‘Climate-related urban migration: scope and gaps in the academic literature**’

Figure S1: List of keywords used for the search process, together with “urban” OR “cit*”

| **Keywords used for publication search in Scopus and WoS** |
| --- |
| Climigration  Climate change migration  Climate change-induced migration  Climate-induced migration  Climate migration  Climate migrant  Climate mobilities  Climate change displacement  Climate displacement  Climate-induced displacement  Climate refugee  Disaster-induced migration  Disaster-induced displacement  Environmental migration  Environmental migrant  Environmental refugee  Environmentally induced migrant  Environmentally displaced person |

Additional notes on the analysis of articles:

The database used for the analysis of the articles consists of multiple categories, including: general information (e.g., article title, publication year, authors); origin-related data (e.g., source, migration triggers, country, and continent); migration type (internal or international); destination (e.g., town, city, or country); migrant profiles (e.g., gender, education, and age); and livelihood conditions at the destination. Once all relevant data were compiled, we proceeded to analyse it.
